# Supplementary material for: Antimicrobial and Anti-Biofilm Activity of Polymyxin E Alone and in Combination with Probiotic Strains of Bacillus subtilis KATMIRA1933 and Bacillus amyloliquefaciens B-1895 against Clinical Isolates of Selected Acinetobacter spp.: A Preliminary Study
Source: MDPI journal article supplement (doi:10.3390/pathogens10121574), 2021-12-02
Supplement: s1 [file s1]

**Table S1.** The diameters of inhibition zones; interpretive standards for the selected *Acinetobacter* spp. strains according to (CLSI, 2020).

| Antibiotic Discs              | Code | Diameter of Inhibition Zone (mm) |              |           |
|-------------------------------|------|----------------------------------|--------------|-----------|
|                               |      | Susceptible                      | Intermediate | Resistant |
| Amikacin                      | AK   | $\geq 17$                        | 15–16        | $14 \leq$ |
| Cefotaxime                    | CTX  | $\geq 23$                        | 15–22        | $14 \leq$ |
| Meropenem                     | MEM  | $\geq 18$                        | 15–17        | $14 \leq$ |
| Trimethoprim-Sulfamethoxazole | SXT  | $16 \geq$                        | 11–15        | $10 \leq$ |
| Polymyxin E                   | PME  | -                                | -            | -         |
| Cefoxitin                     | Fox  | $\geq 21$                        | 14–20        | $\leq 13$ |
